# Supplementary material for: Gene expression profiling suggests differences in molecular mechanisms of fin elongation between cichlid species
Source: PubMed Central journal article supplement (PMC6588699; doi:10.1038/s41598-019-45599-w), 2019-06-21
Supplement: 41598_2019_45599_MOESM2_ESM.pdf [file 41598_2019_45599_MOESM2_ESM.pdf]

# **Gene expression profiling suggests differences in molecular mechanisms of fin elongation between cichlid species**

Ehsan Pashay Ahi<sup>1,2</sup>,  
Email: [ehsanpashayahi@gmail.com](mailto:ehsanpashayahi@gmail.com)

Florian Richter<sup>1</sup>  
Email : [florianrichter1@outlook.com](mailto:florianrichter1@outlook.com)

Laurène Alicia Lecaudey<sup>1</sup>,  
Email: [laurenelecaudey@gmail.com](mailto:laurenelecaudey@gmail.com)

Kristina M. Sefc<sup>1</sup>,  
Email: [kristina.sefc@uni-graz.at](mailto:kristina.sefc@uni-graz.at)

1. Institute of Biology, University of Graz, Universitätsplatz 2, A-8010 Graz, Austria

2. Department of Comparative Physiology, Uppsala University, Norbyvägen 18A, SE-75 236 Uppsala, Sweden

Corresponding Author: Ehsan Pashay Ahi,  
Email: [ehsanpashayahi@gmail.com](mailto:ehsanpashayahi@gmail.com)

### Supplementary Table 1:

Ray segment length differences between fin rays. Upper diagonal: fin ray comparisons in the anal fin; lower diagonal: fin ray comparisons in the dorsal fin. Significant length differences are highlighted in bold.

|            |             | Anal fin                       |                                |                             |                             |
|------------|-------------|--------------------------------|--------------------------------|-----------------------------|-----------------------------|
|            |             | Long ray 1                     | Long ray 2                     | Short ray 1                 | Short ray 2                 |
| Dorsal fin | Long ray 1  | -                              | <b>t = -3.18, p = 0.002</b>    | <b>t = -2.58, p = 0.011</b> | <b>t = -3.07, p = 0.002</b> |
|            | Long ray 2  | t = -0.01, p = 0.99            | -                              | t = 0.60, p = 0.55          | t = 0.11, p = 0.91          |
|            | Short ray 1 | <b>t = 8.15, p &lt; 0.001</b>  | <b>t = 8.16, p &lt; 0.001</b>  | -                           | t = -0.49, p = 0.63         |
|            | Short ray 2 | <b>t = 10.09, p &lt; 0.001</b> | <b>t = 10.10, p &lt; 0.001</b> | t = -1.94, p = 0.054        | -                           |

Long ray 1: longest ray of each fin; long ray 2: 2nd-longest ray; short ray 1: 3<sup>rd</sup>-shortest ray; short ray 2: 2<sup>nd</sup>-shortest ray (the very shortest ray was avoided because it was only rudimentarily developed in some fins).
